# Supplementary material for: Bacterial cellulose-poly(acrylic acid-co-N,N′-methylene-bis-acrylamide) interpenetrated networks for the controlled release of fertilizers
Source: Royal Society of Chemistry journal article supplement (doi:10.1039/c8ra01733f), 2018-01-01
Supplement: c8ra01733f1.pdf [file c8ra01733f1.pdf]

### Electronic Supplementary Information (ESI)

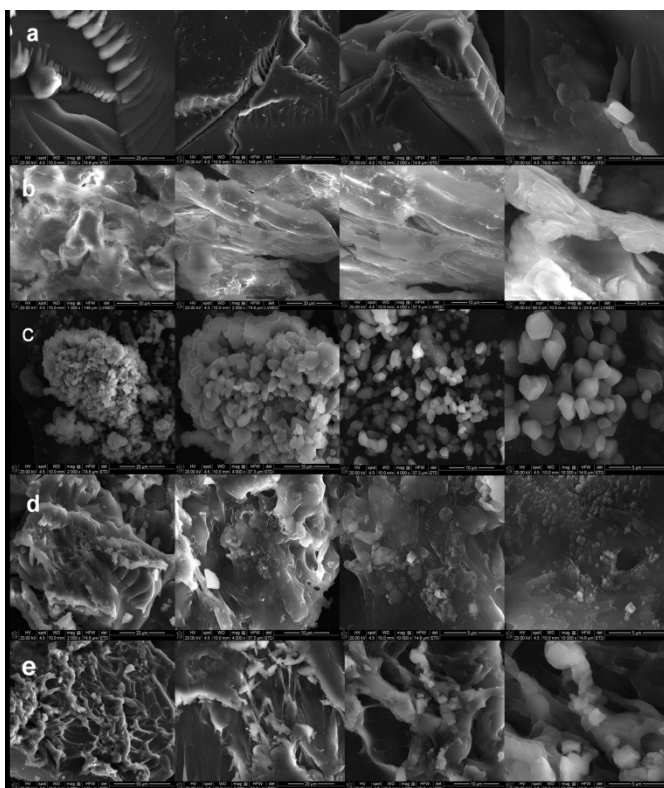

**Figure S1** Morphology of raw materials, control and composite xerogels, after conventional drying, at various scales, in the following order: (a) PAA control xerogel; (b) lyophilized BC; (c) SF; (d) control xerogels with fertilizer, LF-PAA; and (e) composite xerogels with fertilizer, LF-BC-PAA.

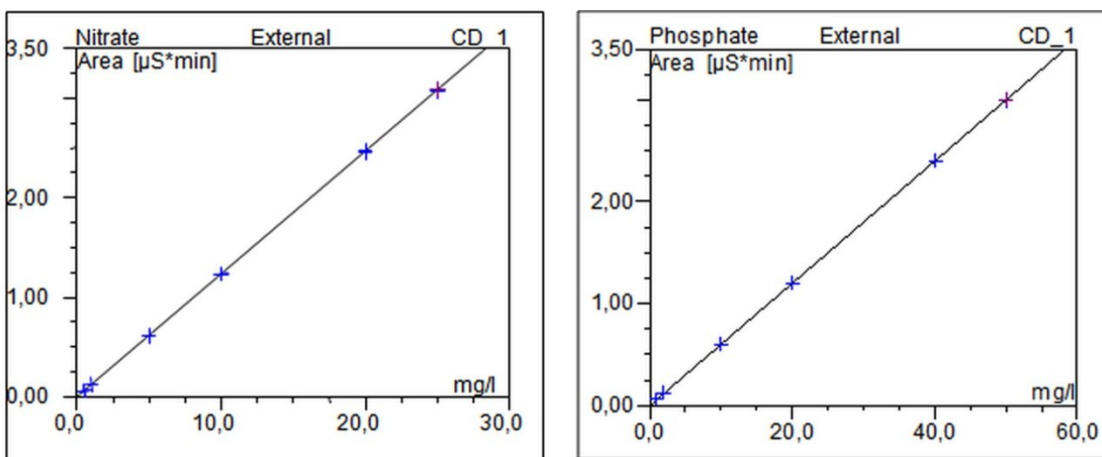

**Figure S2.** Calibration for nitrate and phosphate anions

**Table S1.** Ion chromatography data of LF release in water for control and composite hydrogels

| <b>Control Hydrogel</b> | <b>NO<sub>3</sub><sup>-</sup><br/>mg/L</b> | <b>PO<sub>4</sub><sup>3-</sup><br/>mg/L</b> | <b>Composite Hydrogel</b> | <b>NO<sub>3</sub><sup>-</sup><br/>mg/L</b> | <b>PO<sub>4</sub><sup>3-</sup><br/>mg/L</b> |
|-------------------------|--------------------------------------------|---------------------------------------------|---------------------------|--------------------------------------------|---------------------------------------------|
| 15-LF-PAA (1h)          | 58.88                                      | 5.32                                        | 15-LF-BC-PAA (1h)         | 21.27                                      | 1,16                                        |
| 15-LF-PAA (2h)          | 58.48                                      | 5.12                                        | 15-LF-BC-PAA (2h)         | 47.78                                      | 2.74                                        |
| 15-LF-PAA (3h)          | 58.23                                      | 5.62                                        | 15-LF-BC-PAA (3h)         | 47.79                                      | 2.88                                        |
| 15-LF-PAA (1 day)       | 59.02                                      | 5.30                                        | 15-LF-BC-PAA (1 day)      | 47.85                                      | 4.56                                        |
| 15-LF-PAA (2 days)      | 59.10                                      | 5.42                                        | 15-LF-BC-PAA (2 days)     | 46.86                                      | 4.67                                        |
| 15-LF-PAA (3 days)      | 59.01                                      | 5.52                                        | 15-LF-BC-PAA (3 days)     | 46.41                                      | 4.68                                        |
